# Supplementary material for: Gold nanoparticle modified graphitic carbon nitride/multi-walled carbon nanotube (g-C3N4/CNTs/Au) hybrid photocatalysts for effective water splitting and degradation
Source: Royal Society of Chemistry journal article supplement (doi:10.1039/c4ra15560b), 2015-01-01
Supplement: c4ra15560b1.pdf [file c4ra15560b1.pdf]

### Figure Captions for supporting data

**Fig. S1.** XRD patterns of g-C<sub>3</sub>N<sub>4</sub>, CNTs, g-C<sub>3</sub>N<sub>4</sub>/Au, g-C<sub>3</sub>N<sub>4</sub>/CNTs and g-C<sub>3</sub>N<sub>4</sub>/CNTs/Au hybrids.

**Fig. S2.** Optical absorbance spectra of the colloidal dispersions of Au nanoparticles.

**Fig. S3.** BET surface areas calculated using nitrogen adsorption–desorption isotherms. (a) g-C<sub>3</sub>N<sub>4</sub>, (b) g-C<sub>3</sub>N<sub>4</sub>/Au formed using the 100-vol.% Au dispersion, (c) the g-C<sub>3</sub>N<sub>4</sub>/CNTs hybrid with a mass ratio of 60:40, and (d) ternary g-C<sub>3</sub>N<sub>4</sub>/CNTs/Au with a g-C<sub>3</sub>N<sub>4</sub>/CNTs mass ratio of 60:40 formed using the 100-vol.% Au dispersion. The insets show the corresponding pore-size distributions.

**Fig. S4.** XPS data for the ternary g-C<sub>3</sub>N<sub>4</sub>/CNTs/Au hybrid with a mass ratio of 60:40 and the 100-vol.% Au dispersion. (A) Survey scan and (B) high-resolution spectrum for C 1s, (C) high-resolution spectrum for N 1s, and (D) high-resolution spectrum of Au 4f.

**Fig. S5.** UV-vis absorption spectra for the photocatalytic degradation of RhB under irradiation with visible light using 50 mg L<sup>-1</sup> of the photocatalyst for g-C<sub>3</sub>N<sub>4</sub>, g-C<sub>3</sub>N<sub>4</sub>/Au, g-C<sub>3</sub>N<sub>4</sub>/CNTs and g-C<sub>3</sub>N<sub>4</sub>/CNTs/Au samples with 100 vol.% Au dispersions.

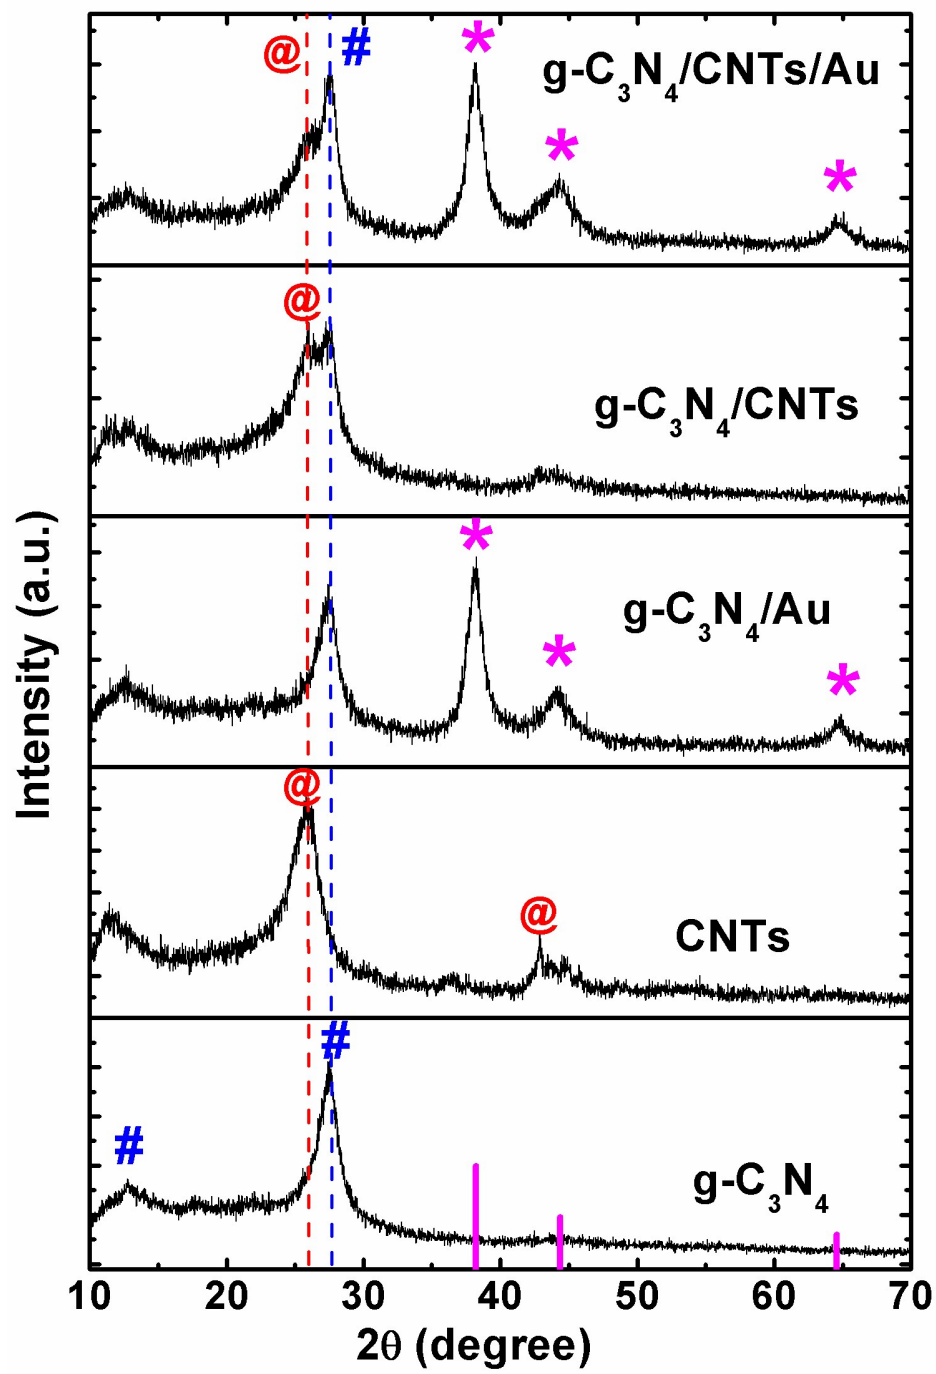

Figure S1

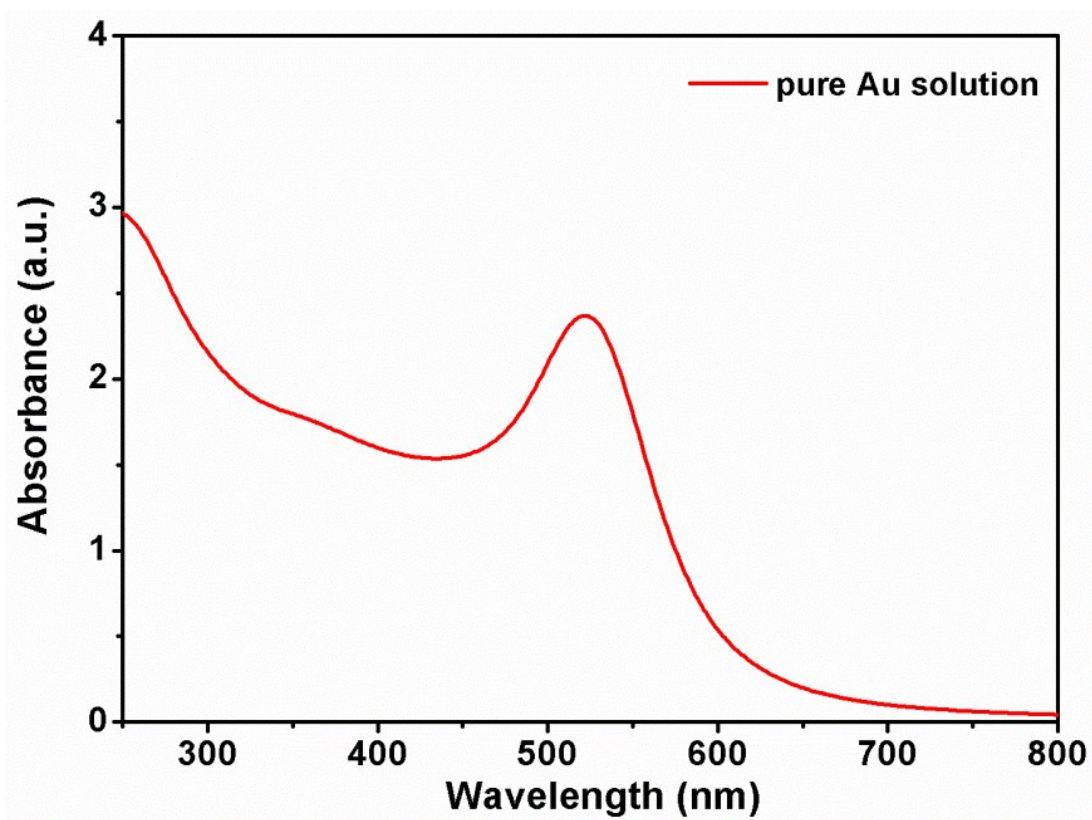

Figure S2

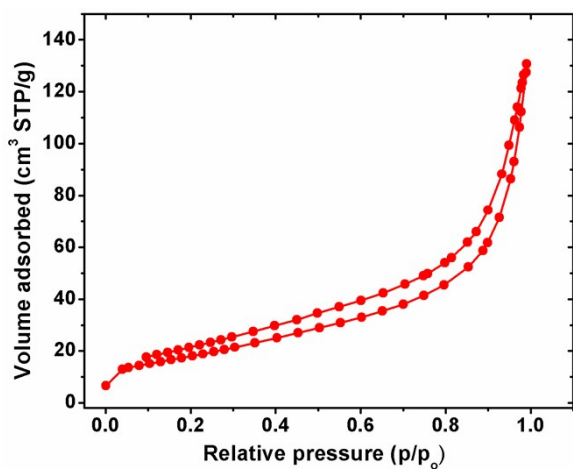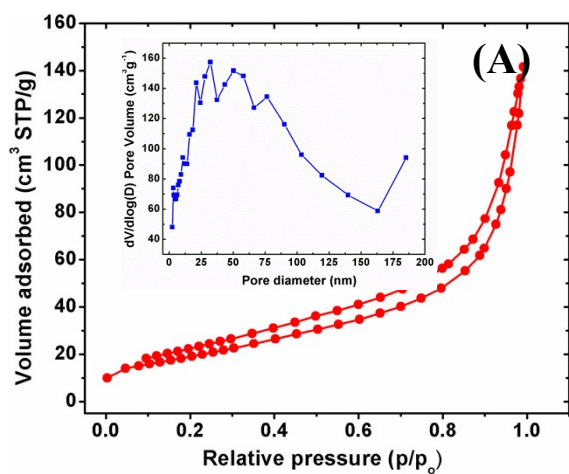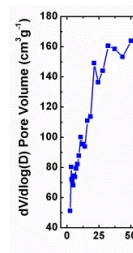

$= 71.02 \text{ m}^2\text{g}^{-1}$

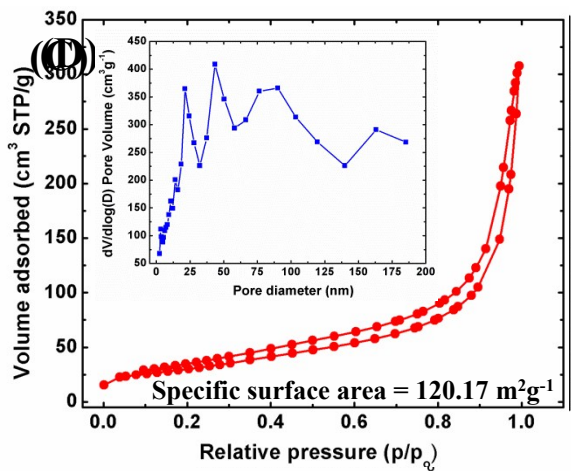

**Figure S3(A to D)**

**N 1s**

**(C)**

**Au 4f**

**(D)**

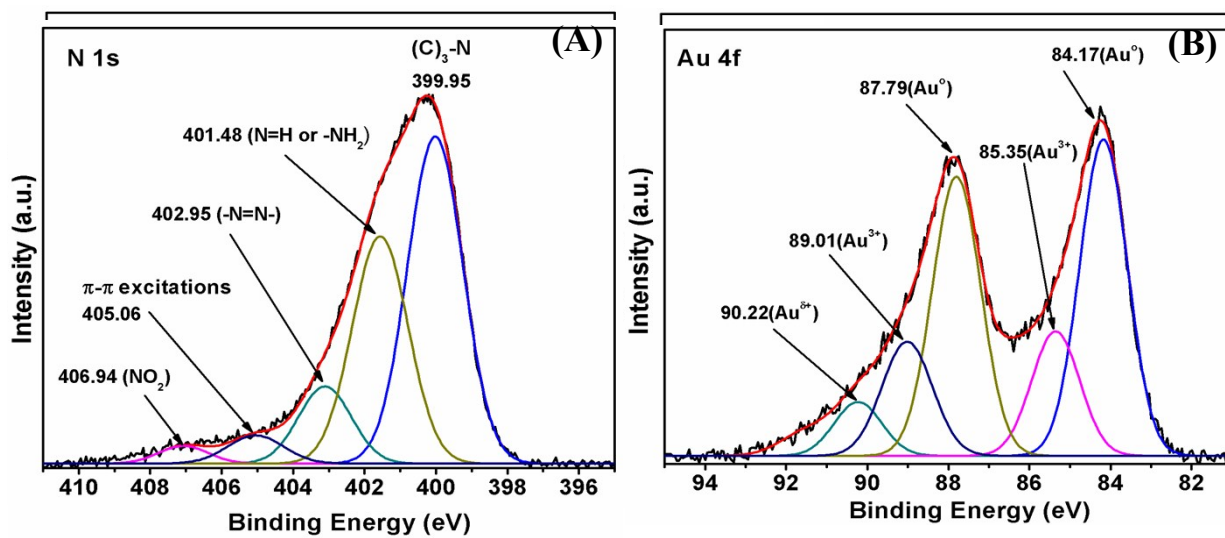

**Figure S4(A-D)**

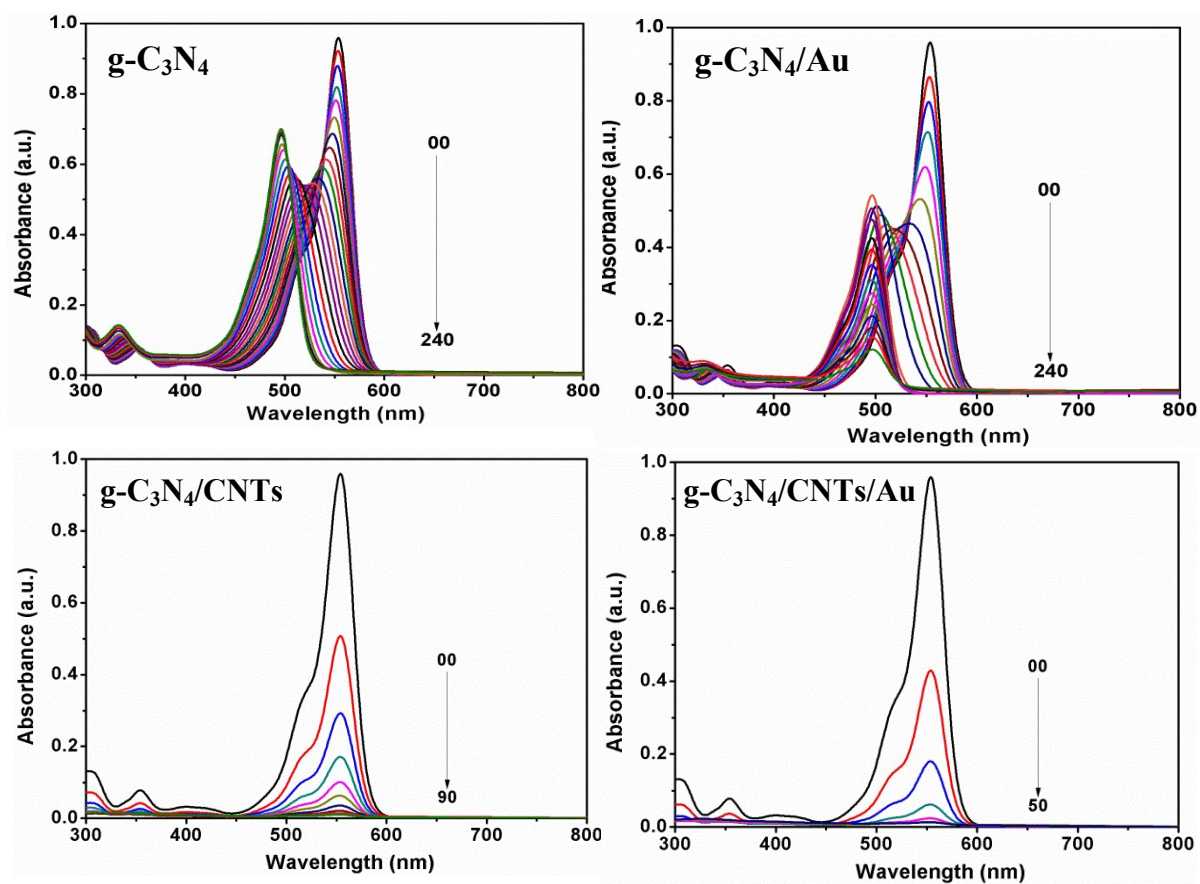

Figure S5
